# Supplementary material for: Hybrid green nonaqueous media: tetraethylene glycol modifies the properties of a (choline chloride + urea) deep eutectic solvent
Source: Royal Society of Chemistry journal article supplement (doi:10.1039/c6ra03726g), 2016-01-01
Supplement: c6ra03726g1.pdf [file c6ra03726g1.pdf]

## **ELECTRONIC SUPPLEMENTARY INFORMATION**

**(ESI)**

### **Hybrid Green Nonaqueous Media: Tetraethylene Glycol Modifies Properties of (Choline Chloride + Urea) Deep Eutectic Solvent**

Anu Kadyan,<sup>a</sup> Kamalakanta Behera,<sup>a</sup> and Siddharth Pandey<sup>\*a</sup>

*<sup>a</sup> Department of Chemistry, Indian Institute of Technology Delhi, Hauz Khas, New Delhi -  
110016, India.*

*\*To whom correspondence should be addressed.*

E-mail: [sipandey@chemistry.iitd.ac.in](mailto:sipandey@chemistry.iitd.ac.in), Phone: +91-11-26596503, Fax: +91-11-26581102

---

**Table S1:**  $E_T^N$ ,  $\pi^*$ ,  $\alpha$ , and  $\beta$  values calculated using absorbance probes Reichardt's Dye 33 (250  $\mu$ M), nitroaniline (NA, 10  $\mu$ M), and *N, N*-diethyl-4-nitroaniline (DENA, 25  $\mu$ M) with equations (1), (2), (3), (4) and (5) for (Reline + TEG) Mixtures at different temperatures as a function of the mole fraction of TEG ( $x_{TEG}$ ).

| T(K) | $E_T^N$     |                |                |                |               |               |               |               |             |
|------|-------------|----------------|----------------|----------------|---------------|---------------|---------------|---------------|-------------|
|      | $x_{TEG}=0$ | $x_{TEG}=0.05$ | $x_{TEG}=0.10$ | $x_{TEG}=0.15$ | $x_{TEG}=0.2$ | $x_{TEG}=0.4$ | $x_{TEG}=0.6$ | $x_{TEG}=0.8$ | $x_{TEG}=1$ |
| 298  | 0.83        | 0.82           | 0.79           | 0.77           | 0.77          | 0.74          | 0.72          | 0.70          | 0.64        |
| 313  | 0.82        | 0.81           | 0.77           | 0.76           | 0.75          | 0.72          | 0.71          | 0.69          | 0.62        |
| 328  | 0.80        | 0.78           | 0.77           | 0.75           | 0.74          | 0.71          | 0.68          | 0.67          | 0.59        |
| 343  | 0.78        | 0.78           | 0.74           | 0.74           | 0.72          | 0.69          | 0.67          | 0.66          | 0.57        |
| 358  | 0.78        | 0.76           | 0.74           | 0.72           | 0.71          | 0.67          | 0.66          | 0.64          | 0.54        |

| T(K) | $\pi^*$     |                |                |                |               |               |               |               |             |
|------|-------------|----------------|----------------|----------------|---------------|---------------|---------------|---------------|-------------|
|      | $x_{TEG}=0$ | $x_{TEG}=0.05$ | $x_{TEG}=0.10$ | $x_{TEG}=0.15$ | $x_{TEG}=0.2$ | $x_{TEG}=0.4$ | $x_{TEG}=0.6$ | $x_{TEG}=0.8$ | $x_{TEG}=1$ |
| 298  | 1.23        | 1.24           | 1.21           | 1.19           | 1.15          | 1.08          | 1.03          | 0.99          | 0.90        |
| 313  | 1.23        | 1.23           | 1.21           | 1.19           | 1.15          | 1.08          | 0.99          | 0.97          | 0.86        |
| 328  | 1.23        | 1.23           | 1.23           | 1.17           | 1.15          | 1.05          | 0.99          | 0.93          | 0.84        |
| 343  | 1.23        | 1.23           | 1.21           | 1.17           | 1.14          | 1.05          | 0.97          | 0.92          | 0.82        |
| 358  | 1.23        | 1.23           | 1.21           | 1.17           | 1.14          | 1.03          | 0.95          | 0.90          | 0.78        |

| T(K) | $\alpha$    |                |                |                |               |               |               |               |             |
|------|-------------|----------------|----------------|----------------|---------------|---------------|---------------|---------------|-------------|
|      | $x_{TEG}=0$ | $x_{TEG}=0.05$ | $x_{TEG}=0.10$ | $x_{TEG}=0.15$ | $x_{TEG}=0.2$ | $x_{TEG}=0.4$ | $x_{TEG}=0.6$ | $x_{TEG}=0.8$ | $x_{TEG}=1$ |
| 298  | 0.56        | 0.53           | 0.50           | 0.48           | 0.51          | 0.51          | 0.53          | 0.53          | 0.49        |
| 313  | 0.55        | 0.52           | 0.47           | 0.47           | 0.47          | 0.49          | 0.54          | 0.52          | 0.48        |
| 328  | 0.52        | 0.48           | 0.44           | 0.46           | 0.45          | 0.49          | 0.49          | 0.52          | 0.44        |
| 343  | 0.48        | 0.46           | 0.41           | 0.43           | 0.44          | 0.45          | 0.47          | 0.52          | 0.42        |
| 358  | 0.46        | 0.44           | 0.40           | 0.40           | 0.41          | 0.44          | 0.47          | 0.49          | 0.39        |

| T(K) | $\beta$     |                |                |                |               |               |               |               |             |
|------|-------------|----------------|----------------|----------------|---------------|---------------|---------------|---------------|-------------|
|      | $x_{TEG}=0$ | $x_{TEG}=0.05$ | $x_{TEG}=0.10$ | $x_{TEG}=0.15$ | $x_{TEG}=0.2$ | $x_{TEG}=0.4$ | $x_{TEG}=0.6$ | $x_{TEG}=0.8$ | $x_{TEG}=1$ |
| 298  | 0.50        | 0.50           | 0.55           | 0.59           | 0.65          | 0.69          | 0.71          | 0.63          | 0.67        |
| 313  | 0.50        | 0.52           | 0.55           | 0.59           | 0.63          | 0.67          | 0.73          | 0.61          | 0.69        |
| 328  | 0.50        | 0.50           | 0.52           | 0.59           | 0.61          | 0.69          | 0.68          | 0.63          | 0.66        |
| 343  | 0.50        | 0.50           | 0.55           | 0.56           | 0.61          | 0.66          | 0.68          | 0.62          | 0.61        |
| 358  | 0.50        | 0.50           | 0.55           | 0.56           | 0.61          | 0.64          | 0.65          | 0.62          | 0.61        |

**Table S2:** Densities ( $\rho/\text{g}\cdot\text{cm}^{-3}$ ) of (Reline + TEG) mixtures at pressure  $p = 0.1$  MPa and  $T = 298$  K to  $358$  K as a function of mole fraction of TEG ( $x_{\text{TEG}}$ ).

| $x_{\text{TEG}}$ | Temperature (K) |       |       |       |       |
|------------------|-----------------|-------|-------|-------|-------|
|                  | 298             | 313   | 328   | 343   | 358   |
| 0.00             | 1.194           | 1.186 | 1.178 | 1.169 | 1.157 |
| 0.05             | 1.191           | 1.182 | 1.174 | 1.165 | 1.154 |
| 0.10             | 1.185           | 1.176 | 1.168 | 1.159 | 1.148 |
| 0.15             | 1.182           | 1.172 | 1.165 | 1.155 | 1.144 |
| 0.20             | 1.177           | 1.167 | 1.160 | 1.150 | 1.139 |
| 0.40             | 1.158           | 1.147 | 1.139 | 1.130 | 1.119 |
| 0.60             | 1.144           | 1.133 | 1.125 | 1.116 | 1.105 |
| 0.80             | 1.133           | 1.122 | 1.114 | 1.105 | 1.095 |
| 1.00             | 1.121           | 1.109 | 1.101 | 1.092 | 1.082 |
